# Supplementary material for: Challenging Aggressive Behaviors Experienced by Personal Support Workers in Comparison to Home Care Workers: Relationships between Caregiver Experiences and Psychological Health
Source: MDPI journal article supplement (doi:10.3390/ijerph17155486), 2020-07-29
Supplement: s1 [file s1]

**Supplementary Table 1.** Percentage of full-time PSWs experiencing challenging behaviors relative to HCWs

| In the last 12 months of work, have you...                                                                    | PSW<br>Yes% (n) <sup>a</sup> | HCW<br>Yes% (n) <sup>b</sup> | % Difference; Fisher's Exact Test <sup>cd</sup> |
|---------------------------------------------------------------------------------------------------------------|------------------------------|------------------------------|-------------------------------------------------|
| <b>Verbal Aggression</b>                                                                                      |                              |                              |                                                 |
| Had someone cry to make you feel guilty                                                                       | 33.8 (27)                    | 29.2 (351)                   | 4.6%; $p=.373$                                  |
| Been yelled at, shouted at, or sworn at                                                                       | 48.8 (39)                    | 41.6 (496)                   | 7.2%; $p=.161$                                  |
| Had someone be verbally aggressive with you                                                                   | 38.8 (31)                    | 34.7 (408)                   | 4.1%; $p=.332$                                  |
| <b>Workplace Aggression</b>                                                                                   |                              |                              |                                                 |
| <i>Had a door slammed in your face</i>                                                                        | 32.5 (26)                    | 11.3 (135)                   | 21.2%; $p<.001$                                 |
| <i>Had someone harm themselves in front of you</i>                                                            | 21.3 (17)                    | 6.5 (78)                     | 14.8%; $p<.001$                                 |
| Been cornered, or placed in a position that was difficult to get out of                                       | 27.5 (22)                    | 18.6 (223)                   | 8.9%; $p=.054$                                  |
| <i>Had someone try (but fail) to hit you with something</i>                                                   | 28.7 (23)                    | 9.3 (112)                    | 19.4%; $p<.001$                                 |
| <i>Been threatened with a weapon other than a knife or gun</i>                                                | 13.8 (11)                    | 2.2 (26)                     | 11.6%; $p<.001$                                 |
| <b>Workplace Violence</b>                                                                                     |                              |                              |                                                 |
| <i>Been choked</i>                                                                                            | 3.8 (3)                      | 0.2 (3)                      | 3.6%; $p=.004$                                  |
| <i>Been spat on or been bumped with unnecessary force <sup>e</sup></i>                                        | 41.3 (33)                    | 9.1 (108)                    | 21.9%; $p<.001$                                 |
| Been spat on                                                                                                  | 25.0 (20)                    | --                           | --                                              |
| Been bumped with unnecessary force                                                                            | 40.0 (32)                    | --                           | --                                              |
| <i>Been slapped, been pushed, grabbed, or shoved, or been bitten, kicked, or hit with a fist <sup>e</sup></i> | 40.0 (32)                    | 14.1 (168)                   | 25.9%; $p<.001$                                 |
| Been slapped                                                                                                  | 20.0 (16)                    | --                           | --                                              |
| Been pushed, grabbed, or shoved                                                                               | 33.8 (27)                    | --                           | --                                              |
| Been bitten, kicked, or hit with a fist                                                                       | 31.3 (25)                    | --                           | --                                              |

| In the last 12 months of work, have you...                                                                                                                                      | PSW<br>Yes% (n) <sup>a</sup> | HCW<br>Yes% (n) <sup>b</sup> | % Difference; Fisher's Exact Test <sup>cd</sup> |
|---------------------------------------------------------------------------------------------------------------------------------------------------------------------------------|------------------------------|------------------------------|-------------------------------------------------|
| <i>Had someone smash something in your presence or display a loss of control, or had something thrown at you or had someone threaten to throw something at you <sup>e</sup></i> | 48.8 (39)                    | 20.8 (248)                   | 28.0%; $p<.001$                                 |
| Had someone smash something in your presence or display a loss of control                                                                                                       | 47.5 (38)                    | --                           | --                                              |
| Had something thrown at you, or had someone threaten to throw something at you                                                                                                  | 27.5 (22)                    | --                           | --                                              |
| <i>Been threatened with a knife, or had someone handle a knife near you in a threatening manner</i>                                                                             | 3.8 (3)                      | 1.6 (19)                     | 2.2%; $p=.149$                                  |

*Note.* PSWs are personal support workers, and HCWs are home care workers. Italics represent experience rates for PSWs that were over double that of HCWs from Hanson et al. [9]. <sup>a</sup>Data from a subsample of PSWs working full-time (40 hours or more) as a PSW ( $n = 80$ ). <sup>b</sup>Data from Hanson et al. [9], female Home Care Workers in Oregon compensated via Medicaid Waiver or having worked as an HCW within 3 months ( $N = 1219$ ). <sup>c</sup>Difference tests were computed assuming no missing data from Hanson et al. [9]. <sup>d</sup>Due to the substantially smaller sample size of PSWs, a Fisher's exact test was conducted. <sup>e</sup>Hanson et al. [9] combined these items respectively in their frequency rates (i.e., counts reflect participants that experienced at least one of the items). We report the raw frequency rates of both the individual items and the combined items with PSWs, as well as the comparisons of the combined items from HCWs in Hanson et al.

**Supplementary Table 2.** Multivariable regressions predicting health outcomes of full-time PSWs from different forms of workplace aggression

| Model                | Fatigue <sup>a</sup> | Depression <sup>b</sup> | Stress <sup>b</sup> |
|----------------------|----------------------|-------------------------|---------------------|
| Verbal Aggression    | 6.54 (0.40)*         | 0.48 (0.07)             | 0.20 (0.03)         |
| Workplace Aggression | 5.47 (0.33)*         | 1.19 (0.18)             | 0.75 (0.11)         |
| Workplace Violence   | 6.98 (0.43)*         | 0.91 (0.14)             | 0.97 (0.14)         |

*Note.* Values outside parentheses are unstandardized regression coefficients, and values inside parentheses are standardized betas. Verbal Aggression, Workplace Aggression, and Workplace Violence reflect subscales from Hanson et al.'s [9] adaptation of Barling et al.'s [10] Workplace Aggression and Violence Scale. Fatigue reflects the Swedish Occupational Fatigue Inventory [31]. Depression reflects the Center for Epidemiological Studies-Depression Scale [33]. Stress reflects the Perceived Stress Scale-short version [32]. <sup>a</sup> Models predicting fatigue controlled for education, age, work tenure and work hours per week. <sup>b</sup> Models predicting depression and stress controlled for education and age.

\*Regression coefficients were significant ( $p < .05$ ). All other coefficients were non-significant ( $p > .05$ ).
